# Supplementary material
Source: Elsevier journal article supplement (https://www.sciencedirect.com/science/article/pii/S2530016418301691)
Supplement: mmc1 [file S2530016418301691:mmc1.docx]

**Supplementary Table**. Results of the bivariate analysis including P-values up to 0.1.

| **Characteristic** | **Composite outcome*** | | |
| --- | --- | --- | --- |
|  | Yes | No | P-Value |
| **Diabetic Retinopathy** | 20 (54.1%) | 30 (68.2%) | 0.193 |
| **Feet pulses present** | 33 (86.8%) | 43 (95.6%) | 0.155 |
|  | **Major Amputation** | | |
|  | Yes | No | P-Value |
| **Male gender** | 3 (42.9%) | 50 (68.5%) | 0.171 |
| **Presence of pain** | 5 (71.4%) | 30 (40.5%) | 0.153 |
|  | **Hospitalisation** | | |
|  | Yes | No | P-Value |
| **Diabetic Nephropathy** | 13 (65.5%) | 29 (48.3%) | 0.196 |
| **Presence of oedema** | 9 (45%) | 41 (66.1%) | 0.092 |
| **Presence of infection** | 9 (45%) | 14 (22.6%) | 0.091 |
| **Probe-to-bone positive** | 6 (66.7%) | 6 (31.6%) | 0.091 |
|  | **New Ulcer** | | |
|  | Yes | No | P-Value |
| **Chronic Charcot** | 12 (80%) | 18 (56.3%) | 0.114 |
| **DM type 2** | 22 (100%) | 55 (90.2%) | 0.127 |
| **Diabetic Retinopathy** | 10 (45.5%) | 40 (67.8%) | 0.066 |
| **Diabetic Nephropathy** | 15 (68.2%) | 27 (45.8%) | 0.072 |
| **Presence of pain** | 5 (22.7%) | 27 (44.3%) | 0.075 |
| **Presence of infection** | 9 (40.9%) | 14 (23%) | 0.170 |
| **Probe-to-bone positive** | 3 (27.35) | 9 (52.5%) | 0.180 |
|  | **Death** | | |
|  | Yes | No | P-Value |
| **Diabetic Retinopathy** | 3 (0%) | 46 (60.5%) | 0.167 |

*Composite outcome consists of any of the following events: new foot ulcer, major amputation, hospitalitsation or death
